# Supplementary material for: Ethylene-mediated nitric oxide depletion pre-adapts plants to hypoxia stress
Source: PubMed Central journal article supplement (PMC6728379; doi:10.1038/s41467-019-12045-4), 2019-09-05
Supplement: 41467_2019_12045_MOESM1_ESM.pdf [file 41467_2019_12045_MOESM1_ESM.pdf]

# Supplementary Information

## *Ethylene-mediated nitric oxide depletion pre-adapts plants to hypoxia stress*

Sjon Hartman<sup>1</sup>, Zeguang Liu<sup>1</sup>, Hans van Veen<sup>1</sup>, Jorge Vicente<sup>2</sup>, Emilie Reinen<sup>1</sup>, Shanice Martopawiro<sup>1</sup>, Hongtao Zhang<sup>3</sup>, Nienke van Dongen<sup>1</sup>, Femke Bosman<sup>1</sup>, George W. Bassel<sup>4</sup>, Eric J.W. Visser<sup>5</sup>, Julia Bailey-Serres<sup>1,6</sup>, Frederica L. Theodoulou<sup>3</sup>, Kim H. Hebelstrup<sup>7</sup>, Daniel J. Gibbs<sup>4</sup>, Michael J. Holdsworth<sup>2\*</sup>, Rashmi Sasidharan<sup>1\*</sup> and Laurentius A.C.J. Voeseinek<sup>1\*</sup>

<sup>1</sup>. Plant Ecophysiology, Institute of Environmental Biology, Utrecht University, Padualaan 8, 3584 CH, Utrecht, The Netherlands

<sup>2</sup>. School of Biosciences, University of Nottingham, Loughborough, LE12 5RD, United Kingdom

<sup>3</sup>. Plant Sciences Department, Rothamsted Research, Harpenden, AL5 2JQ, United Kingdom

<sup>4</sup>. School of Biosciences, University of Birmingham, Edgbaston B15 2TT, United Kingdom

<sup>5</sup>. Department of Experimental Plant Ecology, Institute for Water and Wetland Research, Radboud University Nijmegen, 6525 AJ, Nijmegen, the Netherlands

<sup>6</sup>. Botany and Plant Sciences Department and Center for Plant Cell Biology, University of California, Riverside, California 92521, United States

<sup>7</sup>. Department of Molecular Biology and Genetics, Aarhus University, Forsøgsvej 1, DK-4200 Slagelse, Denmark

### **This Supplementary Information file contains:**

Supplementary Figures 1-10

Supplementary Table 1 (Genotyping primers)

Supplementary Table 2 (RT-qPCR primers)

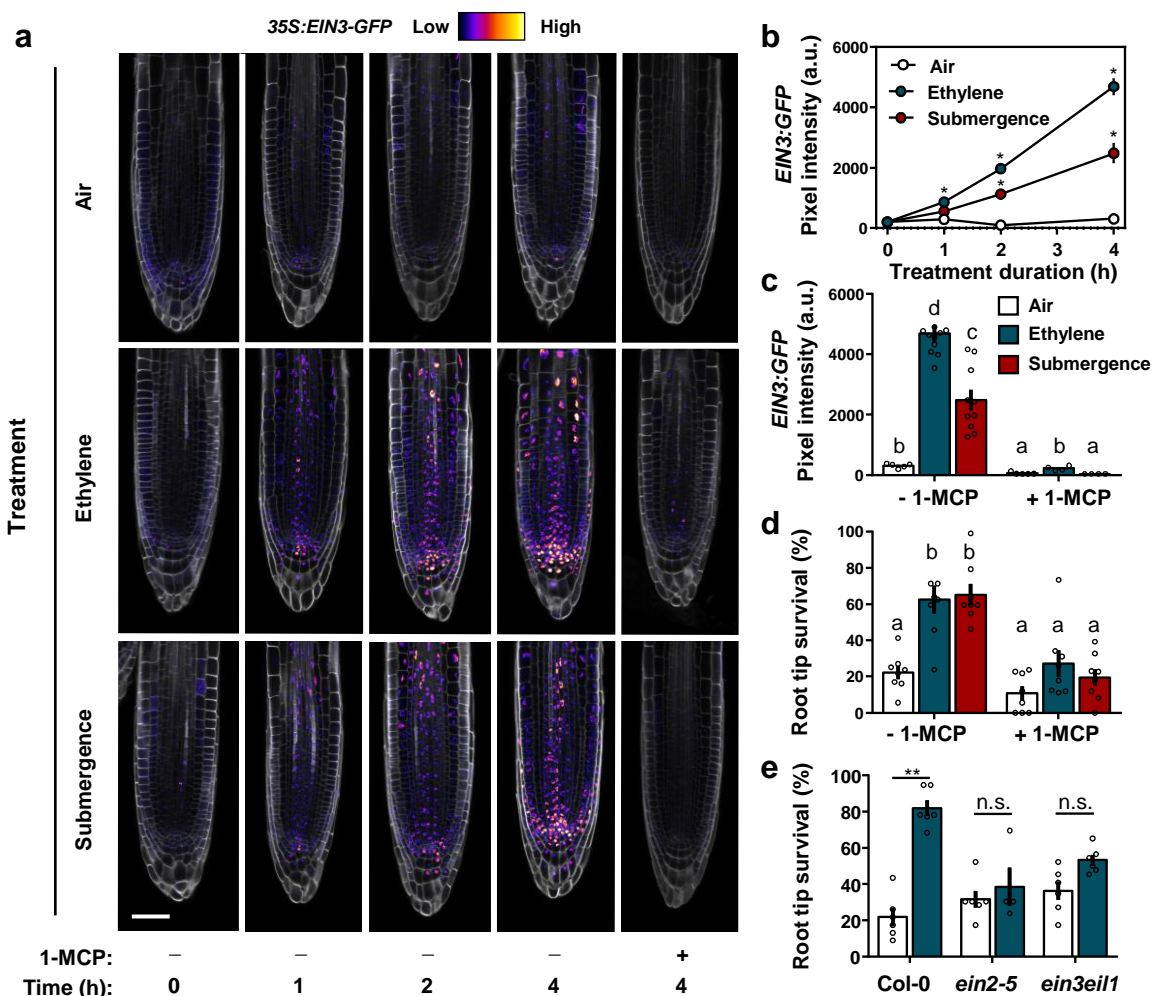

### Supplementary Figure 1. Ethylene signalling mediates early submergence responses towards hypoxia acclimation

**(a)** Representative confocal images and quantification **(b, c)** of protein stability and localization of the ethylene master regulator EIN3, using the *35S:EIN3-GFP* (*ein3eil1* double mutant background) signal in Arabidopsis root tips. Seedlings were treated for up to 4 hours with air (white),  $\sim 5\mu\text{l}^{-1}$  ethylene (blue) or submergence (red), either in combination with or without a pre-treatment of ethylene action inhibitor 1-MCP at the 4 hour time-point. Cell walls were visualized using Calcofluor White stain (scale bar =  $50\mu\text{m}$ ). Mean GFP pixel intensity inside the root tips was quantified using ICY imaging software. **(b)** Asterisks indicate a significant difference from the air mean per time-point ( $p < 0.05$ , ANOVA with planned comparisons, Tukey's HSD correction for multiple comparisons,  $n = 5-12$  roots). **(c)** Samples without 1-MCP are the same as in **(b)** at  $t = 4\text{h}$ . Statistically similar groups are indicated using the same letter ( $p < 0.05$ , 2-way ANOVA, Tukey's HSD,  $n = 5-11$  roots). **(d, e)** Seedling root tip survival of Col-0 after 4 hours of pre-treatment with air (white),  $\sim 5\mu\text{l}^{-1}$  ethylene (blue) or submergence (red), either in combination with or without a pre-treatment of ethylene action inhibitor 1-MCP **(d)**, or Col-0 and two ethylene signalling pathway loss-of-function mutants **(e)** followed by 4 hours of hypoxia and 3 days of recovery. Values are relative to control (normoxia) plants. Statistically similar groups are indicated using the same letter in **(d)**. Asterisks indicate significant differences between air and ethylene in **(e)** ( $p < 0.05$ , Generalized linear model with negative binomial error structure, **(d)**  $n = 8$  rows of  $\sim 23$  seedlings; **(e)**  $n = 4-6$  rows of  $\sim 46$  seedlings). Error bars are SEM, experiments were replicated at least 2 times.

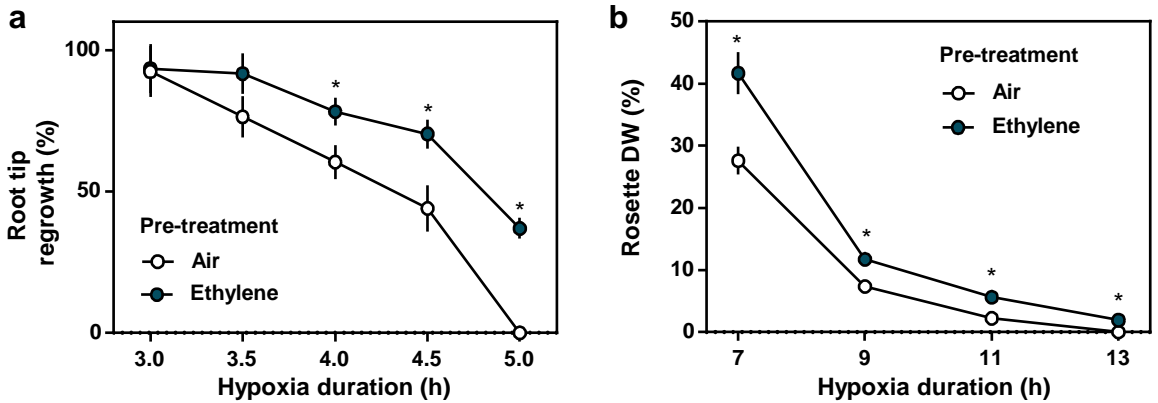

**Supplementary Figure 2. Ethylene pre-treatment enhances plant performance of recovering tissues after subsequent hypoxia**

**(a)** Seedling root tip regrowth capacity of surviving roots after 4 hours of pre-treatment with air (white) or  $\sim 5\mu\text{l l}^{-1}$  ethylene (blue) followed by hypoxia and 3 days of recovery. Values are relative to control (normoxia) plants. Asterisks indicate significant differences between air and ethylene at given time point ( $*p < 0.05$ , Student's *t* test,  $n = 4-8$  rows of 23 seedlings for survival,  $n = 5-35$  surviving roots for regrowth). **(b)** Rosette dry weight (DW) of adult Col-0 plants after 4 hours of pre-treatment with air (white) or  $\sim 5\mu\text{l l}^{-1}$  ethylene (blue) followed by hypoxia and 7 days of recovery. DW was measured only from surviving plants. Values are relative to control (normoxia) plants. Asterisks indicate significant differences between air and ethylene at given time point ( $*p < 0.05$ , Student's *t* test,  $n = 30$  plants). Error bars are SEM, experiments were replicated at least 3 times.

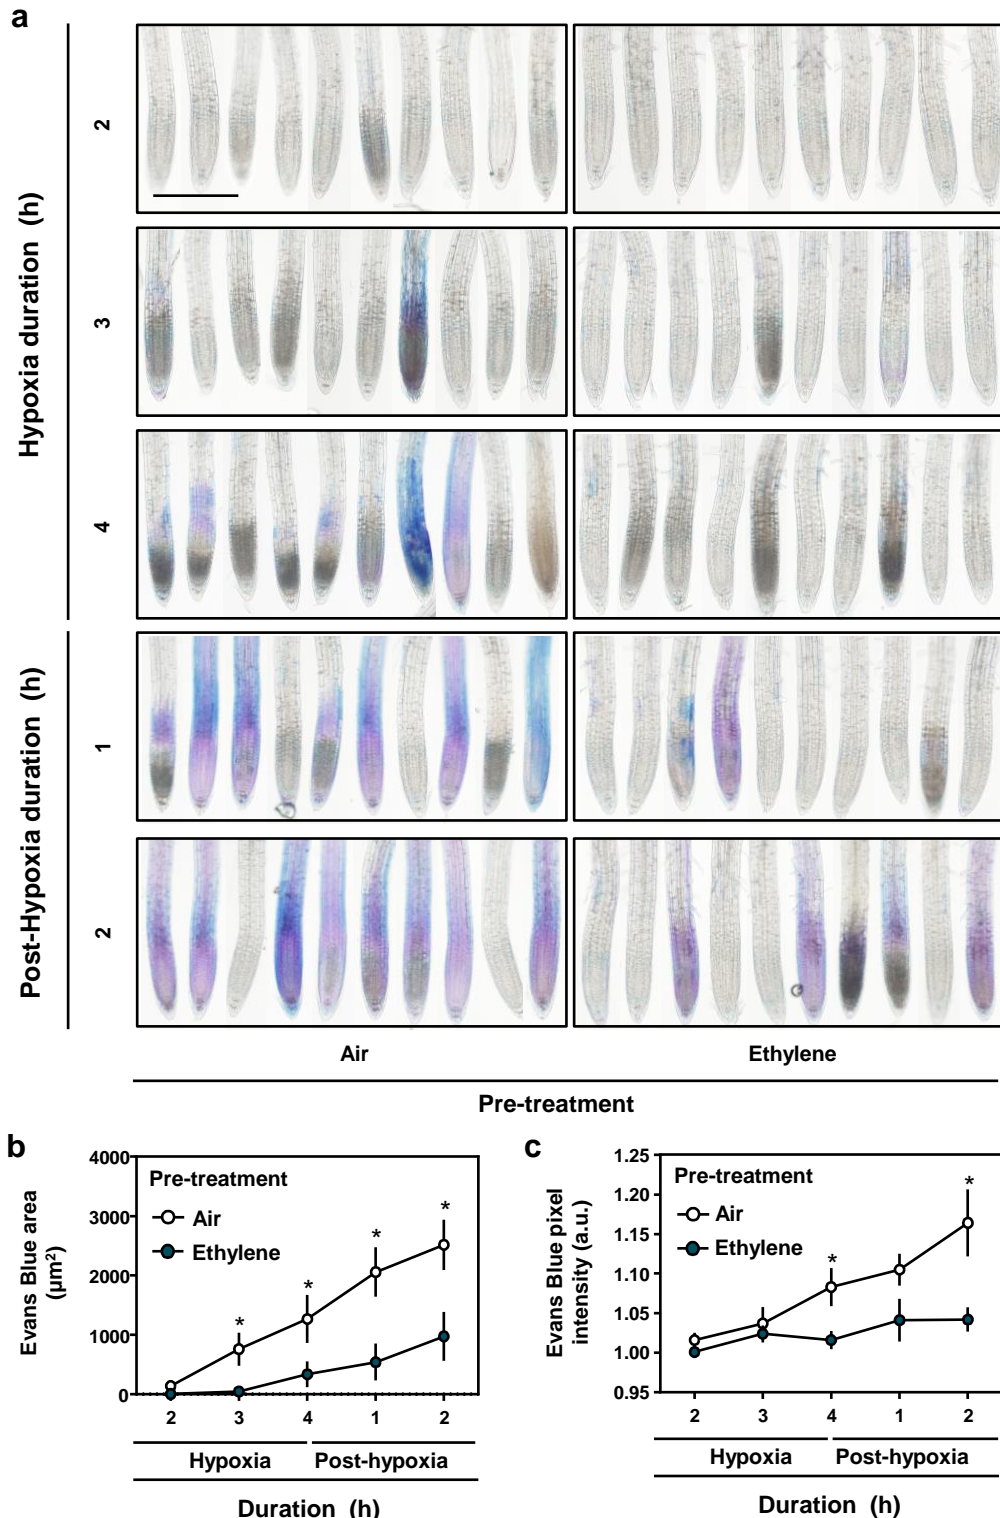

**Supplementary Figure 3. Ethylene pre-treated seedlings show reduced cell damage in root tips during subsequent hypoxia and recovery treatments**

**(a)** Representative light microscopy images of Evans blue staining for impaired cell membrane integrity in seedling root tips after 4 hours of pre-treatment with air or  $\sim 5\mu\text{l}^{-1}$  ethylene followed by 2-4h hypoxia and 1-2h of recovery (scale bar = 2mm). **(b, c)** Quantification of the area (b) and pixel intensity (c) of Evans blue staining in seedling root tips after 4 hours of pre-treatment with air (white) or  $\sim 5\mu\text{l}^{-1}$  ethylene (blue) followed by 2-4h hypoxia and 1-2h of recovery. Asterisks indicate significant differences between air and ethylene at given time point (Error bars are SEM, \* $p < 0.05$ , Student's  $t$  test,  $n = 10$  root tips). Experiments were replicated at least 3 times.

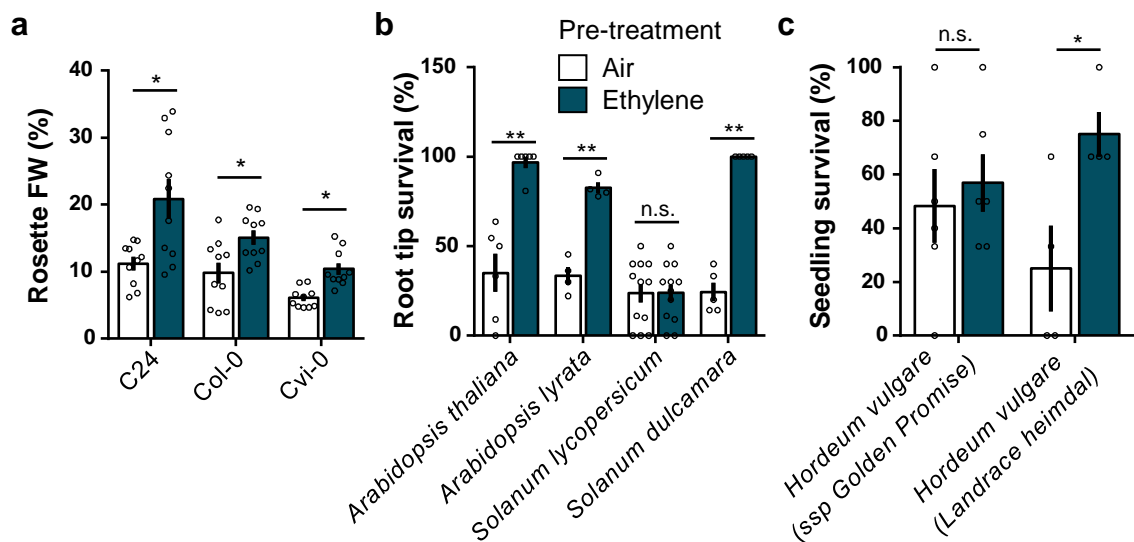

**Supplementary Figure 4. Ethylene-induced hypoxia tolerance is conserved within *Arabidopsis thaliana* accessions and shows variation between other plant species**

**(a)** Relative rosette fresh weight (FW) of adult *Arabidopsis* accessions C24, Col-0 and Cvi-0 plants after 4 hours of pre-treatment with air (white) or  $\sim 5\mu\text{l l}^{-1}$  ethylene (blue) followed by 9 hours of hypoxia and 7 days of recovery. FW was measured only from survived plants (Error bars are SEM, \* $p < 0.05$ , Student's *t* test,  $n = 10$  plants). **(b)** Root tip survival of 4 different plants species after 4 hours of pre-treatment with air (white) or  $\sim 5\mu\text{l l}^{-1}$  ethylene (blue) followed by 4 hours of hypoxia and 3 days of recovery. Asterisks indicate significant differences between air and ethylene (Error bars are SEM, \*\* $p < 0.01$ , Generalized linear model with negative binomial error structure,  $n = 4-12$  rows of 10-46 seedlings depending on species). **(c)** Plant survival of 2 different varieties of Barley (*Hordeum vulgare*) seedlings after 4 hours of pre-treatment with air (white) or  $\sim 5\mu\text{l l}^{-1}$  ethylene (blue) followed by 20 hours of hypoxia and 3 days of recovery. Asterisks indicate significant differences between air and ethylene (Error bars are SEM, \* $p < 0.05$ , Generalized linear model with negative binomial error structure,  $n = 4-6$  replicates containing 3 seedlings). Experiments were replicated at least 2 times, except for a, which was only performed once.

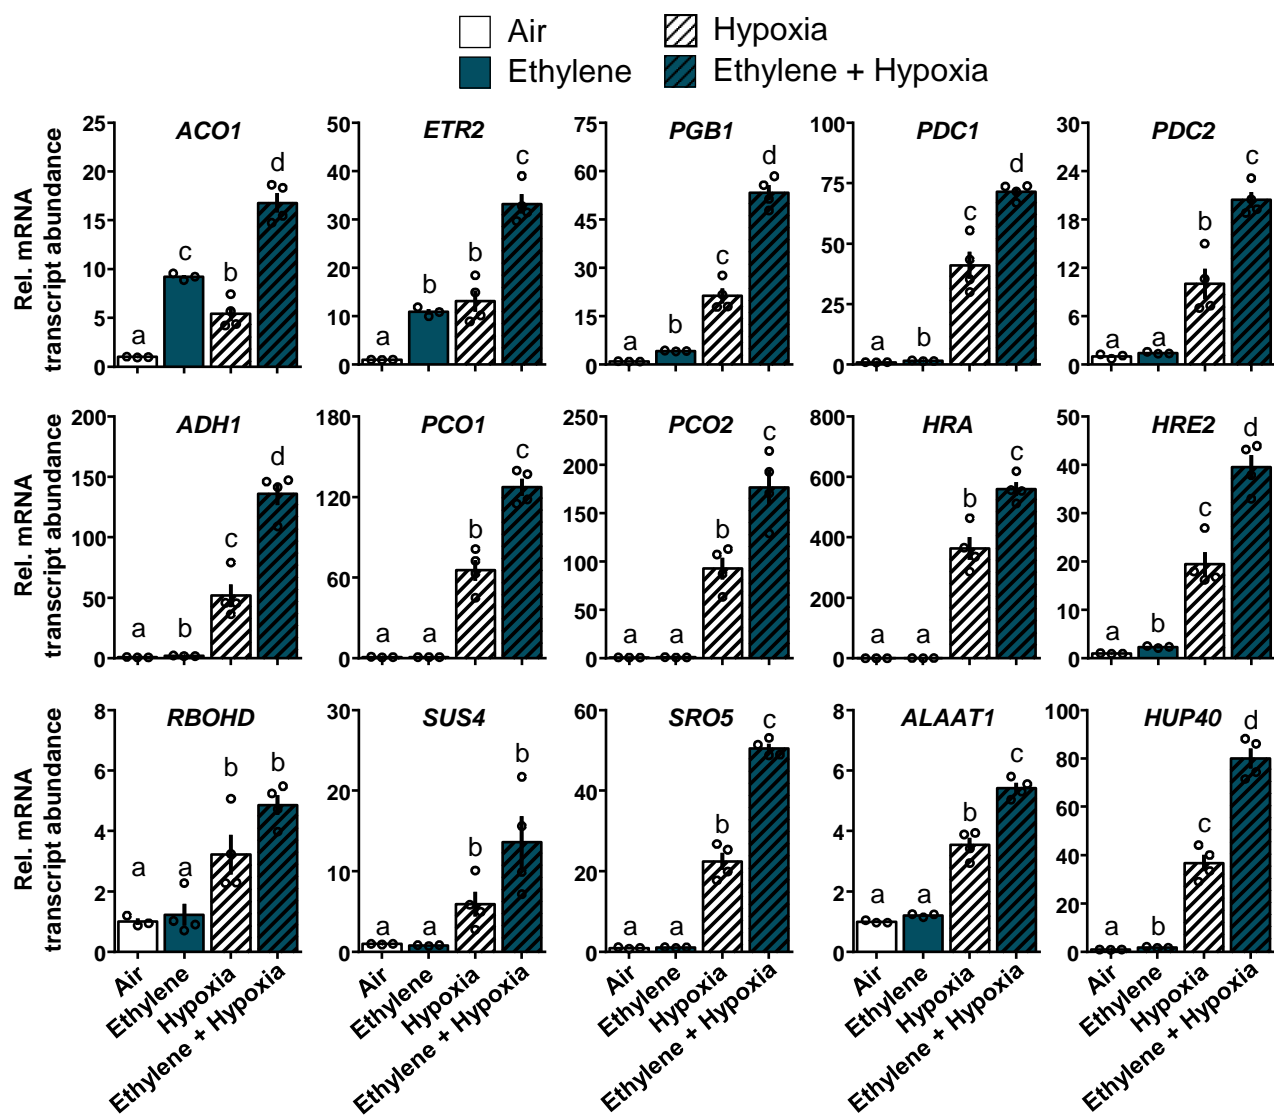

**Supplementary Figure 5. Ethylene pre-treatment augments hypoxia adaptive gene transcripts upon hypoxia**

Relative mRNA transcript abundance of 15 hypoxia adaptive genes in seedling root tips of Col-0 after 4 hours of pre-treatment with air (white) or  $\sim 5\mu\text{l}^{-1}$  ethylene (blue), followed by (4h) hypoxia (dashed stripes). Values are relative to Col-0 air treated samples. Different letters indicate significant differences (Error bars are SEM,  $p < 0.05$ , 1-way ANOVA, Tukey's HSD,  $n=3-4$  replicates of  $\sim 400$  root tips). Experiments were replicated at least 2 times.

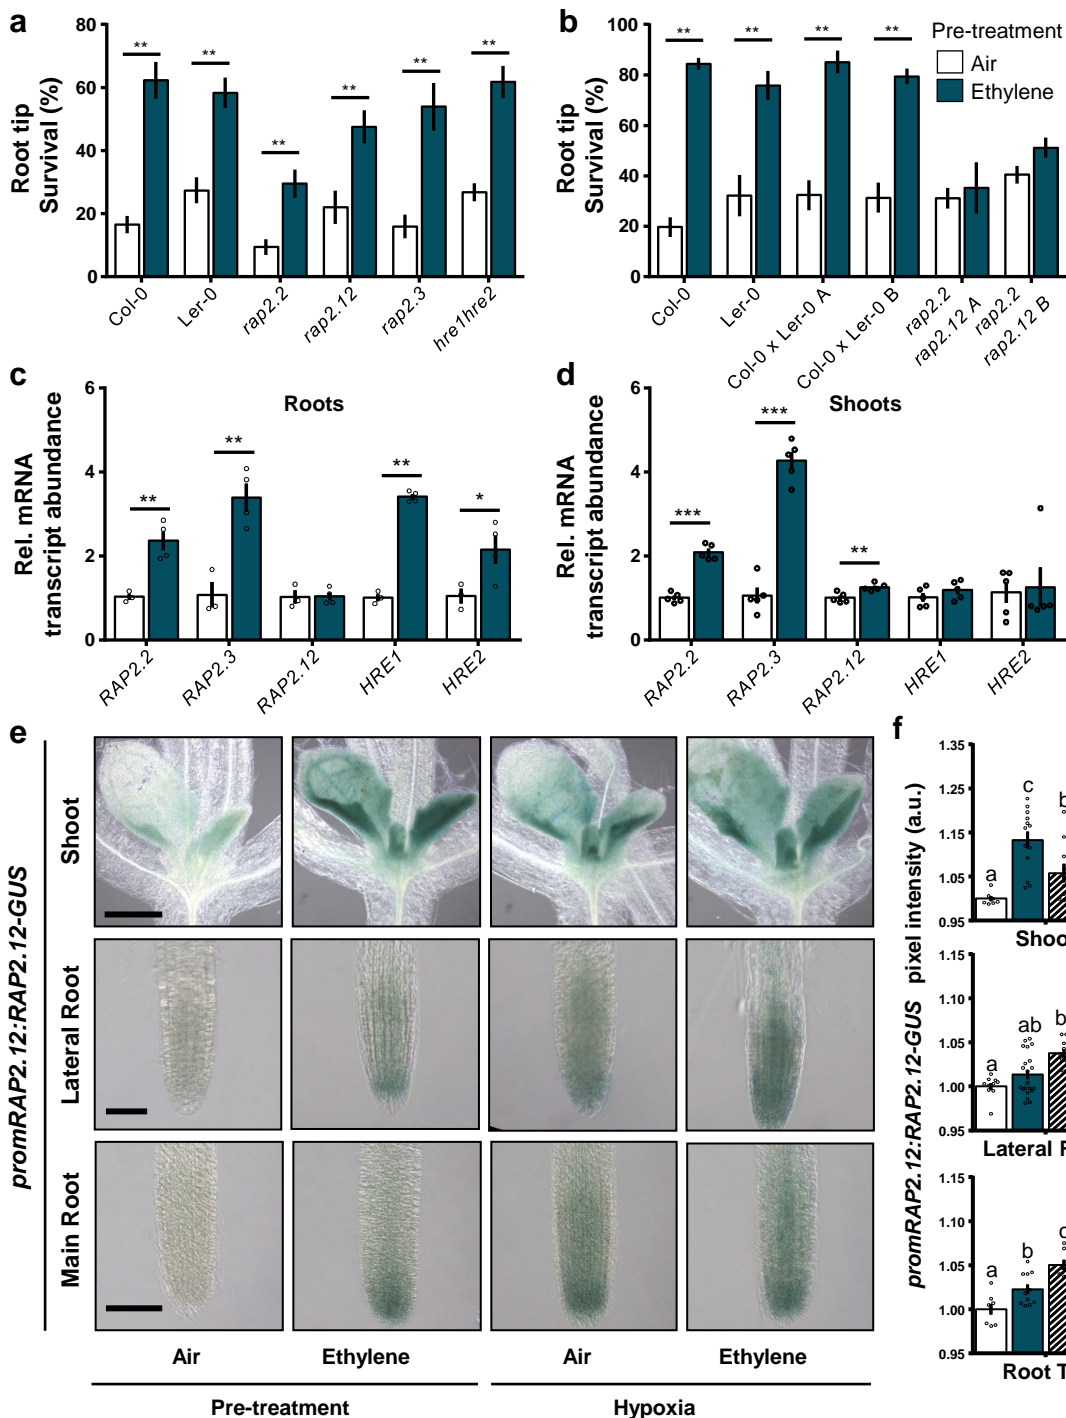

**Supplementary Figure 6. Involvement and regulation of ERFVII during ethylene-induced hypoxia tolerance**  
**(a, b)** Seedling root tip survival of Col-0, Ler-0, ERFVII mutants *rap2.2* (Ler-0 background), *rap2.12*, *rap2.3* and *hre1hre2* (Col-0 background) in a, and Col-0, Ler-0, 2 Col-0 x Ler-0 WT crosses and ERFVII double mutants *rap2.2rap2.12* (2 independent lines in Col-0 x Ler-0 background) in b, after 4 hours of pre-treatment with air (white) or  $\sim 5\mu\text{l}^{-1}$  ethylene (blue) followed by 4 hours of hypoxia and 3 days of recovery. Values are relative to control (normoxia) plants. Asterisks indicate significant differences between air and ethylene (Error bars are SEM,  $^{**}p < 0.01$ , Generalized linear model with negative binomial error structure,  $n = 4-21$  rows consisting of  $\sim 23$  seedlings for a,  $n = 8$  rows consisting of  $\sim 23$  seedlings for b). **(c, d)** Relative mRNA transcript abundance of all 5 ERFVII in root tips of Col-0 seedlings (c) and adult rosettes (d) after air (white) or  $\sim 5\mu\text{l}^{-1}$  ethylene (blue) treatments (4h). Asterisks indicate significant differences between air and ethylene (Error bars are SEM,  $^*p < 0.05$ ,  $^{**}p < 0.01$ ,  $^{***}p < 0.001$ , Generalized linear model with negative binomial error structure,  $n = 3-4$  replicates containing  $\sim 400$  root tips for c,  $n = 5$  replicates of 2 rosettes for d). **(e, f)** Representative DIC microscopy images (e) and quantification (f) of *promRAP2.12::RAP2.12-GUS* in seedling shoots, lateral roots and main root tips after treatments with air (white) or  $\sim 5\mu\text{l}^{-1}$  ethylene (blue) or subsequent (4h) hypoxia (dashed stripes). Scale bars; shoot =  $200\mu\text{m}$ , lateral root =  $60\mu\text{m}$ , main root =  $100\mu\text{m}$ . Values are relative to air treated samples. Statistically similar groups are indicated using the same letter per tissue (Error bars are SEM,  $p < 0.05$ , 1-way ANOVA, Tukey's HSD,  $n = 5-20$  replicates). Experiments were replicated at least 2 times.

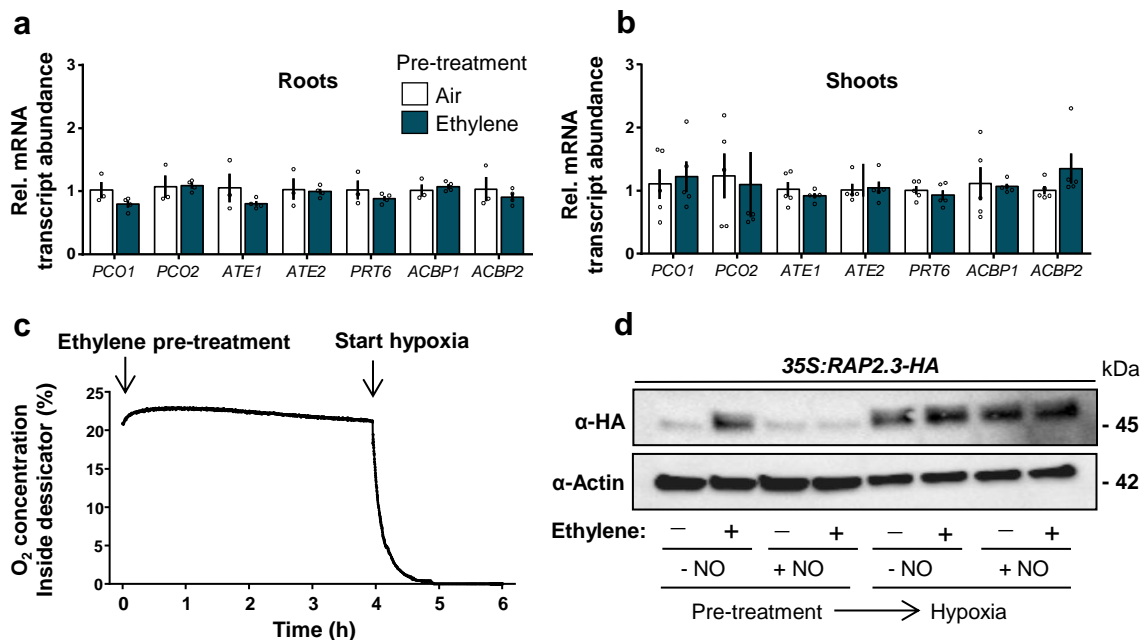

### Supplementary Figure 7. The effects of ethylene on processes known to mediate ERFVII stability

(a, b) Relative mRNA transcript abundance of genes coding for enzymes involved in the PRT6 N-degron pathway or RAP2.12-sequestering Acyl-CoA binding proteins *ACBP1* and *ACBP2* in root tips of Col-0 seedlings (a) and adult rosettes (b) after 4 hours of treatment with air (white) or  $\sim 5\mu\text{l l}^{-1}$  ethylene (blue). Values are relative to Col-0 air treated samples. No significant differences were found between air and ethylene (Error bars are SEM, Student's t test,  $n=3-4$  replicates containing  $\sim 400$  root tips for a,  $n=5$  replicates of 2 rosettes for b). (c) Levels of molecular oxygen measured over time at the outflow of the desiccators during the ethylene pre-treatment and subsequent hypoxia treatments in this study. Oxygen levels generally reached  $<0.00\%$  between 40 and 50 minutes of flushing the desiccators with humidified 99.996%  $\text{N}_2$  at a rate of  $2\text{ l min}^{-1}$ . (d) RAP2.3 protein levels in *35S::MC-RAP2.3-HA* seedlings (Col-0 background) after air and ethylene pre-treatments (4h), combined with or without an additional NO pulse and subsequent hypoxia (4h). Experiments were replicated at least 2 times, except for d, in which the hypoxia treatment after NO manipulation was only performed once.



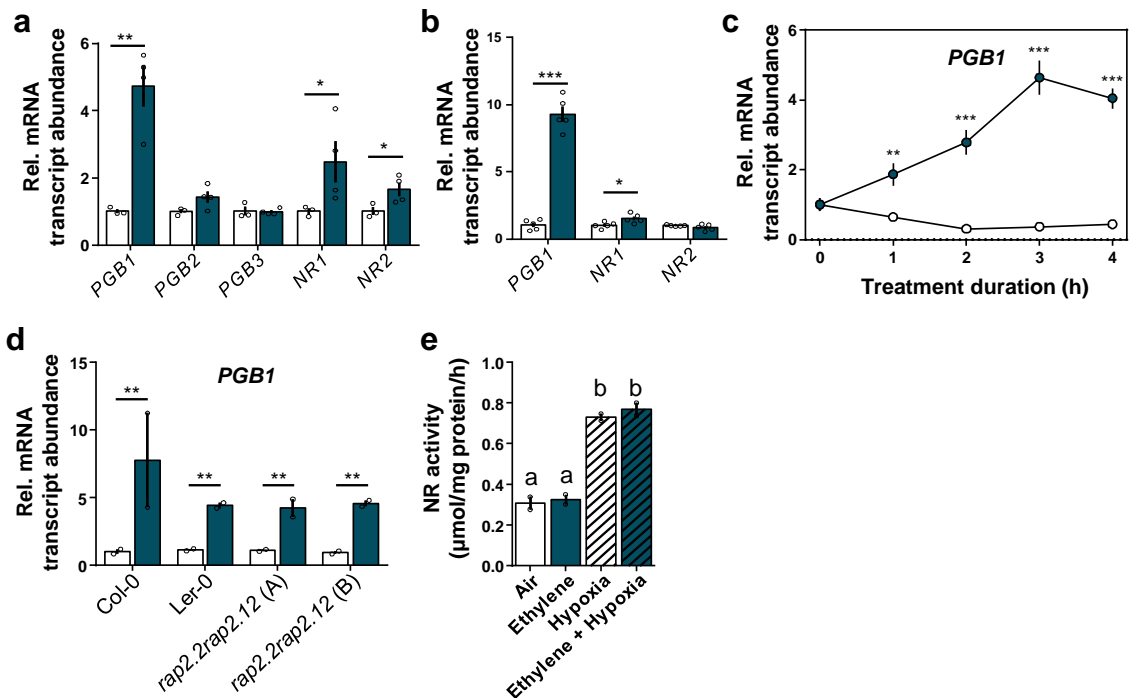

**Supplementary Figure 8. The effects of ethylene on *PHYTOGLOBIN* transcript abundance and *NITRATE REDUCTASE* transcript abundance and activity**

(a, b) Relative mRNA abundance of genes coding for enzymes involved in NO metabolism in seedling root tips (a) and adult rosettes (b) of Col-0 plants after 4 hours of treatment with air (white) or  $\sim 5\mu\text{l}^{-1}$  ethylene (blue). Values are relative to Col-0 air treated samples. Asterisks indicate significant differences between air and ethylene (\*\* $p < 0.01$ , \*\*\* $p < 0.001$ , \* $p < 0.05$  Student's *t* test,  $n = 3-4$  replicates of  $\sim 400$  root tips in a,  $n = 5$  replicates of 2 rosettes in b). (c) Relative *PGB1* mRNA transcript abundance in rosettes of Col-0 plants during 4 hours of treatment with air (white) or  $\sim 5\mu\text{l}^{-1}$  ethylene (blue). Asterisks indicate significant differences between air and ethylene (\*\* $p < 0.01$ , \*\*\* $p < 0.001$ , ANOVA with planned comparisons, Tukey's HSD correction for multiple comparisons,  $n = 5$  replicates of 2 rosettes). (d) Relative *PGB1* mRNA transcript abundance in seedlings of Arabidopsis Col-0 and Ler-0 WT, and 2 double *rap2.2rap2.12* mutants (Col-0  $\times$  Ler-0 background) after 4 hours of treatment with air (white) or  $\sim 5\mu\text{l}^{-1}$  ethylene (blue). Values are relative to Col-0 air treated samples. Asterisks indicate significant differences between air and ethylene (\*\* $p < 0.01$ , ANOVA with planned comparisons, Tukey's HSD correction for multiple comparisons,  $n = 2$  replicates of  $\sim 400$  root tips). (e) Nitrate reductase activity in whole Col-0 WT seedlings after 4 hours of pre-treatment with air (white) or  $\sim 5\mu\text{l}^{-1}$  ethylene (blue), followed by (4h) hypoxia (dashed stripes). Statistically similar groups are indicated using the same letter ( $p < 0.05$ , 1-way ANOVA, Tukey's HSD,  $n = 2$  replicates of  $\sim 200$  seedlings). All error bars are SEM, experiments were replicated at least 2 times, except for e, which was only performed once.

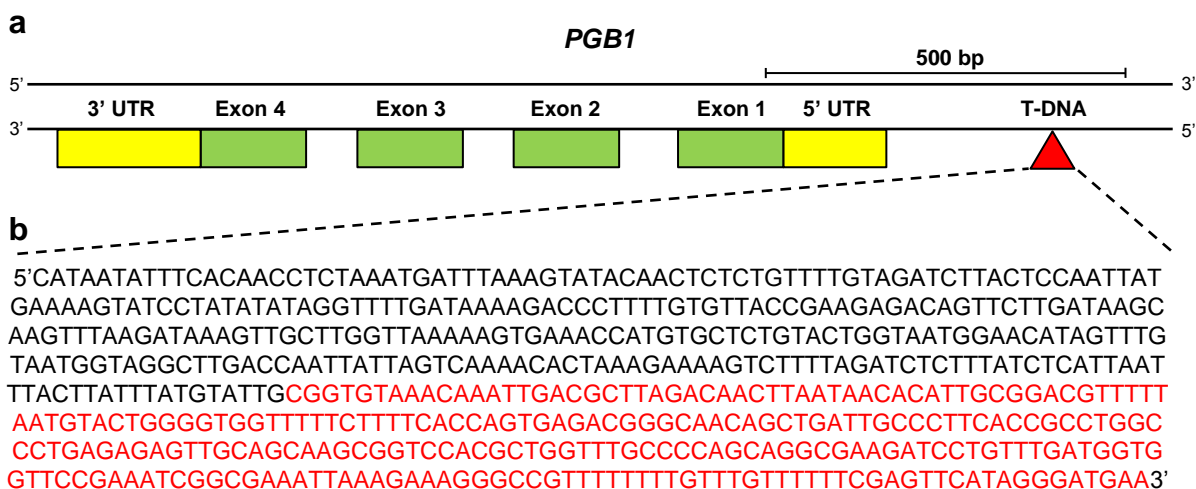

**Supplementary Figure 9. Identification of *pgb1-1* mutant line SK\_058388**

(a) Schematic map of genomic *PGB1* gene region including the 4 *PGB1* exons (green) and the location of the t-DNA insertion (red triangle) of *pgb1-1* line SK\_058388. (b) Partial DNA sequencing reaction of *pgb1-1* aligned with genomic *PGB1* gene region. The aligned native *PGB1* sequence (black) ends and the T-DNA sequence (red) starts exactly 300bp upstream of the *PGB1* start codon.

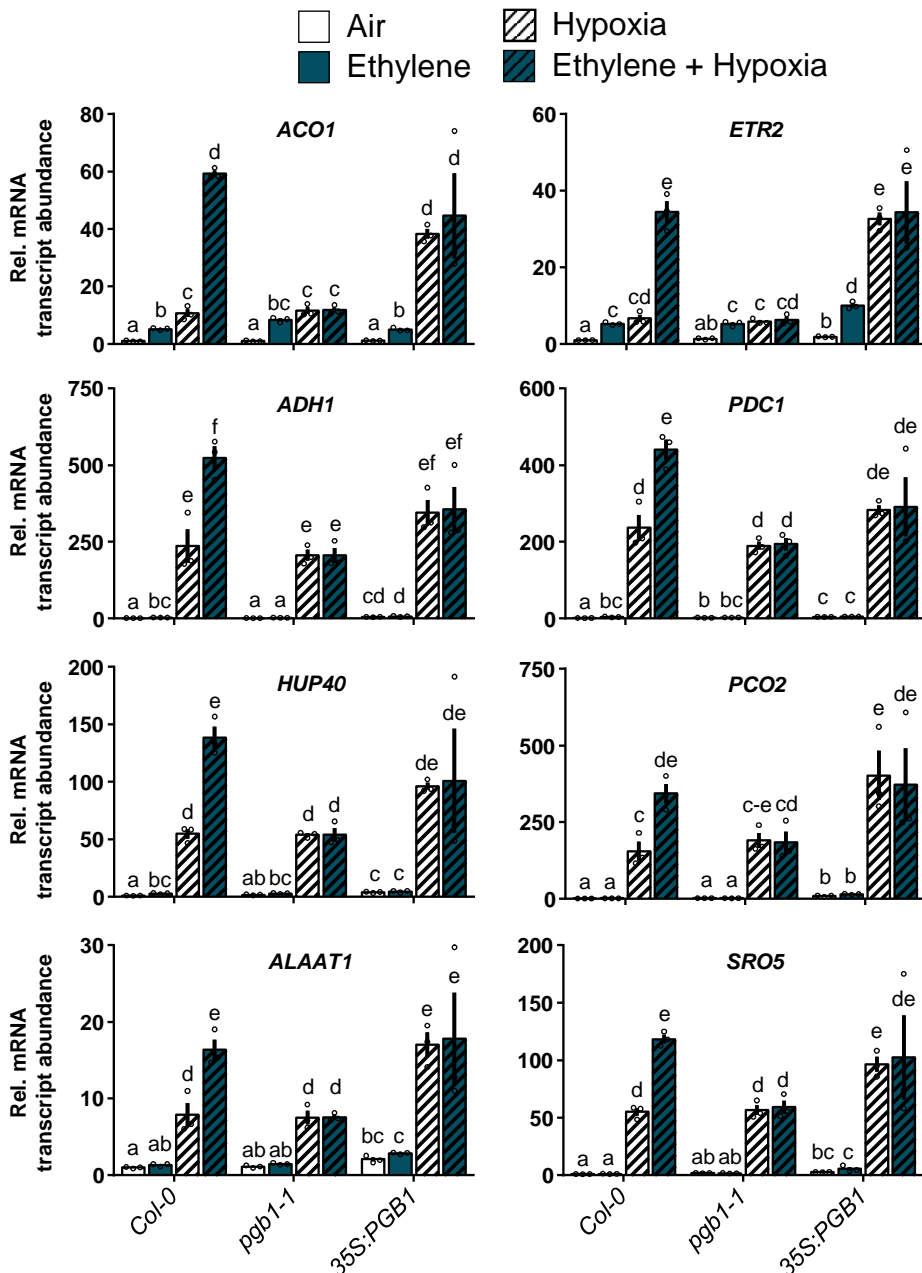

**Supplementary Figure 10. Hypoxia adaptive gene expression in *PGB1* knock-down and over-expression lines**

Relative mRNA transcript abundance of 8 hypoxia adaptive genes in seedling root tips of Col-0, *pgb1-1* and *35S:PGB1* after 4 hours of pre-treatment with air (white) or  $\sim 5 \mu\text{l}^{-1}$  ethylene (blue), followed by (4h) hypoxia (dashed stripes). Values are relative to Col-0 air treated samples. Different letters indicate significant differences (Error bars are SEM,  $p < 0.05$ , 2-way ANOVA, Tukey's HSD,  $n = 3$  replicates containing  $\sim 200$  root tips).

**Supplementary Table 1. List of genotyping primers used in this study**

| T-DNA lines                         | Primer info        | Oligo sequence 5' → 3'        | Additional info                                         |
|-------------------------------------|--------------------|-------------------------------|---------------------------------------------------------|
| <i>rap2.2-5</i><br>(AY201781)       | WT FW              | cgcgctcactaacgagtttat         | <i>Gasch et al., 2015</i> <sup>20</sup>                 |
|                                     | WT REV             | ctccactgggtttcctcttc          |                                                         |
|                                     | T-DNA REV          | cgattaccgtattatcccgt          |                                                         |
| <i>rap2.12-2</i><br>(SAIL_1215_H10) | WT FW              | tctctgattttgacgctgagt         | <i>Gasch et al., 2015</i> <sup>20</sup>                 |
|                                     | WT REV             | agggtttgcaccattgtcctgag       |                                                         |
|                                     | T-DNA REV          | gaattcataaccaatctcgatacac     |                                                         |
| <i>rap2.3-1</i><br>(SAIL_1031_D10)  | WT FW              | atgtgtggcgggtgctattatt        | <i>Gibbs et al., 2014</i> <sup>14</sup>                 |
|                                     | WT REV             | ttactcatacgcgcaatgac          |                                                         |
|                                     | T-DNA REV          | gaattcataaccaatctcgatacac     |                                                         |
| <i>hre1</i><br>(SALK_039484)        | WT FW              | ttacagacagtggcgaaatca         | <i>Gibbs et al., 2014</i> <sup>14</sup>                 |
|                                     | WT REV             | tcaggaccatagaccatgt           |                                                         |
|                                     | T-DNA REV          | atttgccgatttcggaac            |                                                         |
| <i>hre2</i><br>(SALK_052858)        | WT FW              | tgcaaaaggttatagagcacac        | <i>Gibbs et al., 2014</i> <sup>14</sup>                 |
|                                     | WT REV             | ggcaaccggaatctgataga          |                                                         |
|                                     | T-DNA REV          | atttgccgatttcggaac            |                                                         |
| <i>prt6-1</i><br>(SAIL_1278_H11)    | WT FW              | ggcagaaacatccctgaaag          | <i>Gibbs et al., 2011</i> <sup>12</sup>                 |
|                                     | WT REV             | gcagcacaacactggagaag          |                                                         |
|                                     | T-DNA REV          | gaattcataaccaatctcgatacac     |                                                         |
| <i>pgb1-1</i><br>(SALK_058388)      | WT FW              | aagtgttactgtagactcagact       | This paper                                              |
|                                     | WT REV             | cttcgtttgttgcaatctca          |                                                         |
|                                     | T-DNA REV          | atttgccgatttcggaac            |                                                         |
| <i>eil1-1</i>                       | WT FW              | ttgatcgtaatgtccagc            | <i>Alonso et al., 2003</i> <sup>39</sup>                |
|                                     | WT REV             | attttctgtgaggacactg           |                                                         |
|                                     | Transp.REV         | gtcgttccccacactctata          |                                                         |
| <b>Transgenic lines</b>             | <b>Primer info</b> | <b>Oligo sequence 5' → 3'</b> | <b>Additional info:</b>                                 |
| <b>35S:PGB1</b>                     | 35S:FW             | ggaagttcatttcattggagagg       | Kanamycin Resistance                                    |
|                                     | PGB1 REV           | tgacactccaagactcactaca        | <i>Hebelstrup et al., 2006</i> <sup>40</sup>            |
| <b>35S:RAP2.3-HA</b>                | 35S:FW             | ggaagttcatttcattggagagg       | Basta Resistance                                        |
|                                     | RAP2.3 REV         | taatcggaataatagcaccgcc        | <i>Gibbs et al., 2014</i> <sup>14</sup>                 |
| <b>35S:EIN3-GFP</b>                 | 35S:FW             | ggaagttcatttcattggagagg       | Kanamycin resistance<br>In <i>ein3eil1-1</i> background |
|                                     | EIN3 REV           | atgcttgataaccgcagtc           | <i>Xie et al., 2015</i> <sup>7</sup>                    |
| <b>35S:RAP2.12-GFP</b>              | 35S:FW             | ggaagttcatttcattggagagg       | Kanamycin Resistance                                    |
|                                     | RAP2.12 REV        | agggtttgcaccattgtcctgag       | <i>Licausi et al., 2011</i> <sup>13</sup>               |
| <b>35S:δ13-RAP2.12-GFP</b>          | 35S:FW             | ggaagttcatttcattggagagg       | Kanamycin Resistance                                    |
|                                     | RAP2.12 REV        | agggtttgcaccattgtcctgag       | <i>Licausi et al., 2011</i> <sup>13</sup>               |
| <b>promRAP2.12:RAP2.12-GUS</b>      | RAP2.12 FW         | actgaatgggacgcttactgg         | Hygromycin Resistance                                   |
|                                     | GUS REV            | ccatcagcagcttatcgaat          | This paper                                              |
| <b>Other</b>                        | <b>Primer info</b> | <b>Oligo sequence 5' → 3'</b> | <b>Additional info:</b>                                 |
| <b>ein2-5</b>                       | WT FW              | cgctcattccagtggtcttt          | 7bp deletion                                            |
|                                     | WT REV             | tggtatattccgtctgcacca         | <i>Alonso et al., 1999</i> <sup>38</sup>                |
| <b>ein3</b>                         | WT FW              | aggaggatggagagacaa            | G to A substitution at nt1598                           |
|                                     | WT REV             | atgtctgataaccgcagtc           | <i>Alonso et al., 2003</i> <sup>39</sup>                |

**Supplementary Table 2. List of RT-qPCR primers used in this study**

| Target gene | AT code   | Primer name | Oligo sequence 5' → 3'   |
|-------------|-----------|-------------|--------------------------|
| ACBP1       | AT5G53470 | ACBP1_FW    | TGGAGATGCGTTATTGTGA      |
|             |           | ACBP1_R     | GCGAGAAGGTAAGCGAAG       |
| ACBP2       | AT4G27780 | ACBP2_FW    | GTGAGGCGGATTTCGCTTGT     |
|             |           | ACBP2_R     | TGCGGCGGCGGTAGTC         |
| ACO1        | AT2G19590 | ACO1_FW     | CCTCAGATGCAGATTGGGAAAGC  |
|             |           | ACO1_R      | TCATCCATCGTCTTGCTGAGTCC  |
| ADH1        | AT1G77120 | ADH1_FW     | GGTCTTGGTGTCTGTTGGTTT    |
|             |           | ADH1_R      | CTCAGCGATCACCTGTTGAA     |
| APT1        | AT1G27450 | APT1_FW     | AATGGCGACTGAAGATGTGC     |
|             |           | APT1_R      | TCAGTGTGAGAAGAAGCGT      |
| ATE1        | AT5G05700 | ATE1_FW     | TCCTCTCCGTTTCCAGTGGG     |
|             |           | ATE1_R      | CCACGAGAGTTTCAGAAGCACCAG |
| ATE2        | AT3G11240 | ATE2_FW     | AGCAGTAGCAGAAACCGGAGTG   |
|             |           | ATE2_R      | TTCTTGAACCGCGGTATATCCTTG |
| ETR2        | AT3G23150 | ETR2_FW     | TGTTAGATTCTCCGGCGGCTATG  |
|             |           | ETR2_R      | TTCCCATGAATCAACTGCACCAC  |
| HRA         | AT3G10040 | HRA_FW      | CATGACCAACAACCACCGCAAC   |
|             |           | HRA_R       | TTCTGCTGCTGACTCGGAATCG   |
| HRE1        | AT1G72360 | HRE1_FW     | TCCGATGAGCCATTTGTCTTCTCC |
|             |           | HRE1_R      | CCATCTTCCCAAGGCCTTC      |
| HRE2        | AT2G47520 | HRE2_FW     | TTGCTGCCATCAAATCCGT      |
|             |           | HRE2_R      | CCCCTGGTTTAGTATCGGCT     |
| NR1         | AT1G77760 | NIA1_FW     | CTGAGCTGGCAAATCCGAAGC    |
|             |           | NIA1_R      | TGCGTGACCAGGTGTTGTAATC   |
| NR2         | AT1G37130 | NIA2_FW     | AACTCGCCGACGAAGAAGGTTG   |
|             |           | NIA2_R      | GGGTTGTGAAAGCGTTGATGGG   |
| PCO1        | AT5G1512  | PCO1_FW     | ATTGGGTGGTTGATGCTCCAATG  |
|             |           | PCO1_R      | ATGCATGTTCCCGCCATCTTCC   |
| PCO2        | AT5G39890 | PCO2_FW     | TCCCAGCCGAGTTCAGATA      |
|             |           | PCO2_R      | TCCATCAGCCGGGTACAGTA     |
| PDC1        | AT4G33070 | PDC1_FW     | TCGATTGGGTGGTCTGTTGG     |
|             |           | PDC1_R      | TGTCCTGAACCGTGACTTGG     |
| PDC2        | AT5G54960 | PDC2_FW     | TGAAAGCAATCAACACGGCA     |
|             |           | PDC2_R      | CAGCAGAGACTCTAGAGCCC     |
| PRT6        | AT5G02310 | PRT6_FW     | CATATGGAGCCCTTGTTCAGAG   |
|             |           | PRT6_R      | TACACCAGTACCAGCACCACAG   |
| RAP2.2      | AT3G14230 | RAP2.2_FW   | CCTAGCGTCGTATCCCAGAA     |
|             |           | RAP2.2_R    | CTCAGATGTGTTGGCTGCTG     |
| RAP2.3      | AT3G16770 | RAP2.3_FW   | AACTCACGGCTGAGGAACTCTG   |
|             |           | RAP2.3_R    | ACGTTAACTTGGTTGGTGGGATGG |
| RAP2.12     | AT1G53910 | RAP2.12_FW  | ACTGAATGGGACGCTTCACTGG   |
|             |           | RAP2.12_R   | AGGGTTTGCACCATTGTCCTGAG  |
| SRO5        | AT5G62520 | SRO5_FW     | AAGAGGCGGTGCAGATGAAACAC  |
|             |           | SRO5_R      | TTTCGAAACAGAGCACCACCCG   |
| ALAAT1      | AT1G17290 | ALAAT1_FW   | ATTCATGACAGATGGTGCAA     |
|             |           | ALAAT1_R    | TATTTCAAGACCCCATCCTG     |
| SUS4        | AT3G43190 | SUS4_FW     | TTCACCATGGCTAGGCTTGA     |
|             |           | SUS4_R      | CCACCAAGTTCACCAGTTCG     |
| PGB1        | AT2G16060 | HB1_FW      | GGCTCTGTAGTGAAGTCTTGGA   |
|             |           | HB1_R       | CTTCGTTGTTGGTGCAATCTCA   |
| PGB2        | AT3G10520 | HB2_FW      | TGAAGTCCCTCACAAATCCTA    |
|             |           | HB2_R       | AACGCCGCTTTGAGATGAA      |
| PGB3        | AT4G32690 | HB3_FW      | TGGACGATTCGGTTGACATT     |
|             |           | HB3_R       | TGGTTATTGGCTGCGTGT       |
| HUP40       | AT4G24110 | HUP40_FW    | GAAACTTGAGTGCGAGTGTG     |
|             |           | HUP40_R     | CTCAAACCAATCTTTTGTCT     |
| RBOHD       | AT5G47910 | RBOHD_FW    | CTTCTGCAACAACAGCTCTCA    |
|             |           | RBOHD_R     | GTATCCTGCTGTCTCCATC      |
